# Supplementary material
Source: HighWire-hosted journal article supplement (https://bmjopen.bmj.com/content/11/12/e053810)
Supplement: inline-supplementary-material-5 [file inline-supplementary-material-5.pdf]

**Supplementary Table 2** Brant test for goodness-of-fit prior to ordinal logistic regression

|                                       | Chi <sup>2</sup> | P value | Df |
|---------------------------------------|------------------|---------|----|
| Age                                   | 36.3             | <0.001  | 2  |
| CXR zone ( $\geq 4$ abnormal)         | 3.33             | 0.190   | 2  |
| Lymphopenia ( $< 0.7 \times 10^9/L$ ) | 0.84             | 0.657   | 2  |
| CRP ( $> 50$ mg/L)                    | 0.44             | 0.805   | 2  |
| Leucocytosis ( $> 11 \times 10^9/L$ ) | 0.49             | 0.782   | 2  |
| Calcium ( $< 2.2$ mmol/L)             | 3.50             | 0.174   | 2  |
| Respiratory rate ( $> 24$ /min)       | 1.34             | 0.511   | 2  |
| S:F ratio (define)                    | 2.96             | 0.227   | 2  |

A significant test statistic ( $P < 0.05$ ) is evident that the proportional odds assumption has been violated. Df, degrees of freedom.
