# Supplementary material
Source: HighWire-hosted journal article supplement (https://bmjopen.bmj.com/content/11/12/e053810)

Supplementary Figure 2

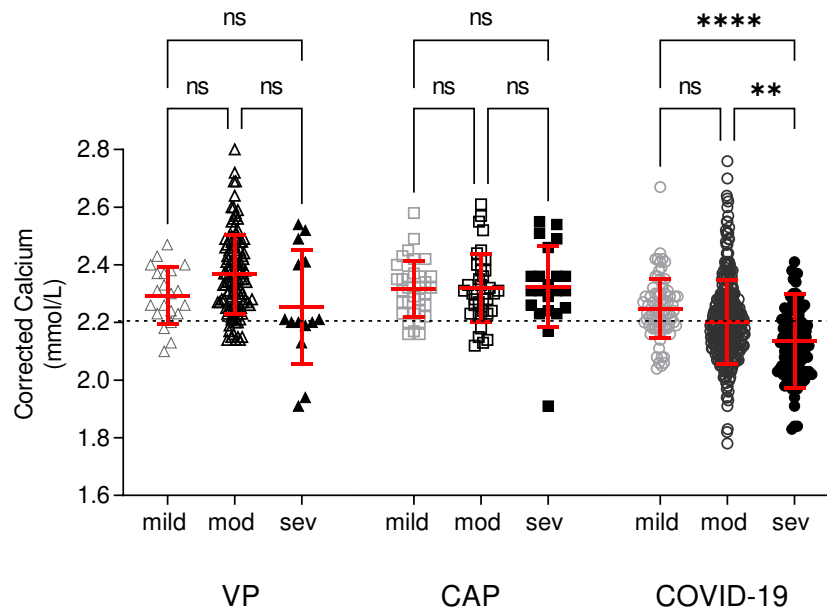

Supplement: inline-supplementary-material-3 [file inline-supplementary-material-3.pdf]
